# Supplementary material for: An Overview of the Evidence and Mechanism of Drug–Herb Interactions Between Propolis and Pharmaceutical Drugs
Source: PubMed Central journal article supplement (PMC9015648; doi:10.3389/fphar.2022.876183), 2022-04-04
Supplement: Image1.pdf [file Image1.pdf]

## Supplementary Material

### 1.1 Supplementary Figures

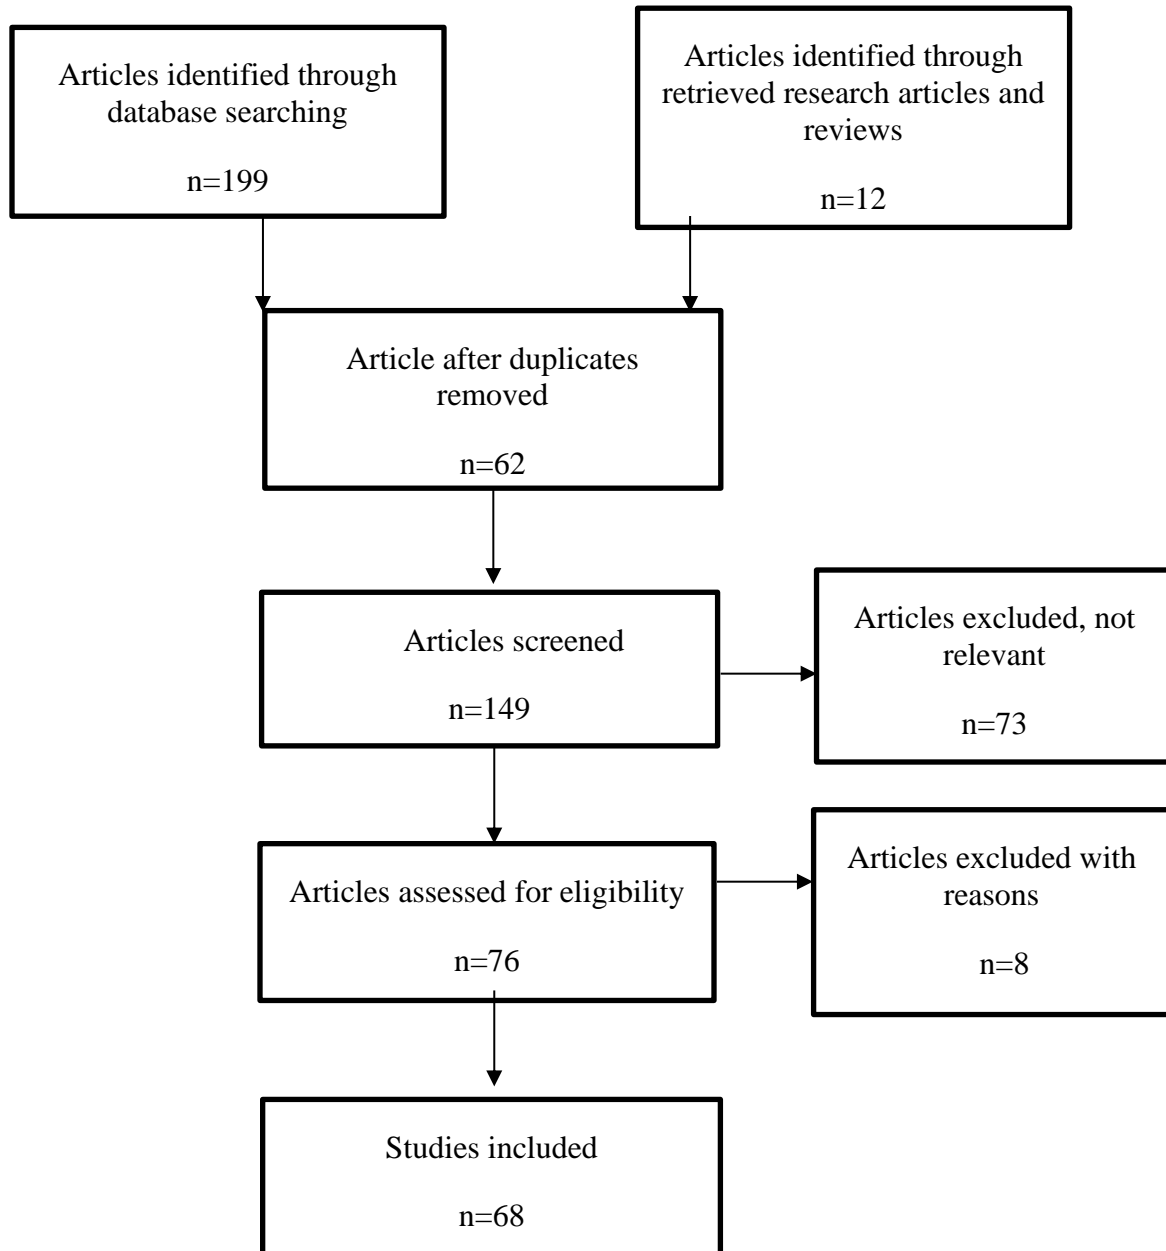

**Supplementary Figure 1.** Flow chart of the study selection process.
